# Supplementary material for: Safety evaluation of a recombinant plasmin derivative lacking kringles 2–5 and rt-PA in a rat model of transient ischemic stroke
Source: PubMed Central journal article supplement (PMC3464715; doi:10.1186/2040-7378-4-10), 2012-05-16
Supplement: 2040-7378-4-10-S1.pdf [file 2040-7378-4-10-S1.pdf]

# **Safety evaluation of a recombinant plasmin derivative lacking kringles 2-5 and rt-PA in a rat model of transient ischemic stroke**

R. Christian Crumrine, PhD<sup>1</sup>; Victor J. Marder, MD<sup>2</sup>; G. McLeod Taylor, DVM<sup>1</sup>; Joseph C. LaManna, PhD<sup>3</sup>; Constantinos P. Tsipis, BS<sup>3</sup>; Valery Novokhatny, PhD<sup>1</sup>; Philip Scuderi, PhD<sup>1</sup>; Stephen R. Petteway, Jr., PhD<sup>1</sup>; Vikram Arora, PhD, DABT<sup>1</sup>.

<sup>1</sup>Grifols Therapeutics, Inc., Research Triangle Park, North Carolina, USA; <sup>2</sup>David Geffen School of Medicine at UCLA, Los Angeles, CA, USA; <sup>3</sup>Case Western Reserve University, Cleveland, Ohio, USA

**Table S1. Physiological Variables – Pre-Ischemia**

| Pre-Ischemia              | Saline (n=6)     | Vehicle (n=6)    | rt-PA (10 mg/kg; n=5) | rt-PA (30 mg/kg; n=6) | $\Delta$ (K2-K5) Plasmin (0.15 mg/kg; n=6) | $\Delta$ (K2-K5) Plasmin (0.5 mg/kg; n=6) | $\Delta$ (K2-K5) Plasmin (1.5 mg/kg; n=6) | $\Delta$ (K2-K5) Plasmin (5 mg/kg; n=5) |
|---------------------------|------------------|------------------|-----------------------|-----------------------|--------------------------------------------|-------------------------------------------|-------------------------------------------|-----------------------------------------|
| pH                        | 7.47 $\pm$ 0.01  | 7.48 $\pm$ 0.01  | 7.47 $\pm$ 0.01       | 7.45 $\pm$ 0.01       | 7.47 $\pm$ 0.01                            | 7.47 $\pm$ 0.01                           | 7.46 $\pm$ 0.01                           | 7.46 $\pm$ 0.02                         |
| pCO2 (mmHg)               | 38.0 $\pm$ 1.0   | 37.1 $\pm$ 1.2   | 38.7 $\pm$ 0.5        | 40.2 $\pm$ 1.0        | 37.7 $\pm$ 0.9                             | 37.7 $\pm$ 1.4                            | 37.9 $\pm$ 0.9                            | 37.9 $\pm$ 0.0                          |
| pO2 (mmHg)                | 100.3 $\pm$ 5.8  | 109.6 $\pm$ 3.6  | 97.0 $\pm$ 5.3        | 115.8 $\pm$ 7.8       | 105.0 $\pm$ 3.4                            | 116.0 $\pm$ 5.0                           | 113.5 $\pm$ 9.0                           | 97.8 $\pm$ 8.7                          |
| Glu (mmol/L)              | 7.0 $\pm$ 0.4    | 7.5 $\pm$ 0.5    | 7.1 $\pm$ 0.2         | 7.7 $\pm$ 0.7         | 7.1 $\pm$ 0.1                              | 7.2 $\pm$ 0.5                             | 6.5 $\pm$ 0.2                             | 6.5 $\pm$ 0.2                           |
| MABP (mmHg)               | 134.9 $\pm$ 25.2 | 135.0 $\pm$ 14.7 | 114.3 $\pm$ 8.9       | 170.8 $\pm$ 16.7      | 166.1 $\pm$ 12.6                           | 188.6 $\pm$ 19.5                          | 163.7 $\pm$ 17.0                          | 147.5 $\pm$ 14.8                        |
| PP (mmHg)                 | 50.5 $\pm$ 6.4   | 52.9 $\pm$ 6.7   | 51.0 $\pm$ 1.6        | 67.3 $\pm$ 5.7        | 61.3 $\pm$ 2.0                             | 62.9 $\pm$ 8.0                            | 61.4 $\pm$ 4.0                            | 49.9 $\pm$ 3.7                          |
| HR (beats/min)            | 355 $\pm$ 12     | 355 $\pm$ 11     | 343 $\pm$ 6           | 368 $\pm$ 9           | 343 $\pm$ 3                                | 339 $\pm$ 9                               | 323 $\pm$ 9                               | 341 $\pm$ 4                             |
| Body Temp ( $^{\circ}$ C) | 37.1 $\pm$ 0.0   | 36.9 $\pm$ 0.1   | 37.1 $\pm$ 0.0        | 37.2 $\pm$ 0.1        | 37.1 $\pm$ 0.1                             | 37.0 $\pm$ 0.0                            | 37.0 $\pm$ 4.1                            | 37.0 $\pm$ 0.0                          |
| Body Wt (g)               | 363.7 $\pm$ 6.1  | 364.8 $\pm$ 5.6  | 363.5 $\pm$ 3.4       | 362.3 $\pm$ 6.9       | 359.5 $\pm$ 4.5                            | 363.5 $\pm$ 4.2                           | 356.0 $\pm$ 4.1                           | 355.2 $\pm$ 7.5                         |
| BE (mmol/L)               | 3.8 $\pm$ 0.5    | 3.8 $\pm$ 0.2    | 4.4 $\pm$ 0.8         | 4.0 $\pm$ 0.5         | 3.7 $\pm$ 0.2                              | 4.2 $\pm$ 0.7                             | 3.0 $\pm$ 0.4                             | 3.4 $\pm$ 0.7                           |
| HCO3 (mmol/L)             | 27.4 $\pm$ 0.4   | 27.4 $\pm$ 0.2   | 28.0 $\pm$ 0.7        | 27.8 $\pm$ 0.3        | 27.3 $\pm$ 0.3                             | 27.6 $\pm$ 0.6                            | 26.8 $\pm$ 0.3                            | 27.1 $\pm$ 0.6                          |
| TCO2 (mmol/L)             | 28.5 $\pm$ 0.4   | 28.3 $\pm$ 0.2   | 29.0 $\pm$ 0.7        | 29.2 $\pm$ 0.3        | 28.5 $\pm$ 0.4                             | 28.7 $\pm$ 0.7                            | 27.8 $\pm$ 0.3                            | 28.2 $\pm$ 0.5                          |
| sO2 (%)                   | 97.8 $\pm$ 0.5   | 98.7 $\pm$ 0.2   | 97.6 $\pm$ 0.4        | 98.5 $\pm$ 0.2        | 98.5 $\pm$ 0.2                             | 98.8 $\pm$ 0.2                            | 98.3 $\pm$ 0.4                            | 97.8 $\pm$ 0.4                          |
| Na (mmol/L)               | 139.7 $\pm$ 0.3  | 139.8 $\pm$ 0.2  | 139.0 $\pm$ 0.5       | 139.5 $\pm$ 0.5       | 139.7 $\pm$ 0.4                            | 139.8 $\pm$ 0.6                           | 139.8 $\pm$ 0.3                           | 139.6 $\pm$ 0.2                         |
| K (mmol/L)                | 4.5 $\pm$ 0.1    | 4.4 $\pm$ 0.1    | 4.5 $\pm$ 0.1         | 4.5 $\pm$ 0.1         | 4.6 $\pm$ 0.1                              | 4.5 $\pm$ 0.1                             | 4.3 $\pm$ 0.1                             | 4.5 $\pm$ 0.1                           |
| iCa (mmol/L)              | 1.3 $\pm$ 0.0    | 1.3 $\pm$ 0.0    | 1.3 $\pm$ 0.0         | 1.3 $\pm$ 0.0         | 1.3 $\pm$ 0.0                              | 1.3 $\pm$ 0.0                             | 1.3 $\pm$ 0.0                             | 1.3 $\pm$ 0.0                           |
| Hct (%PCV)                | 0.43 $\pm$ 0.01  | 0.46 $\pm$ 0.01  | 0.45 $\pm$ 0.01       | 0.45 $\pm$ 0.02       | 0.47 $\pm$ 0.01                            | 0.46 $\pm$ 0.01                           | 0.46 $\pm$ 0.01                           | 0.46 $\pm$ 0.01                         |
| Hb (mmol/L)               | 15.0 $\pm$ 0.3   | 15.8 $\pm$ 0.2   | 15.4 $\pm$ 0.2        | 15.2 $\pm$ 0.8        | 15.8 $\pm$ 0.3                             | 15.7 $\pm$ 0.2                            | 15.7 $\pm$ 0.2                            | 15.7 $\pm$ 0.2                          |
| Systolic BP (mmHg)        | 163.7 $\pm$ 21.5 | 166.2 $\pm$ 14.4 | 147.1 $\pm$ 9.4       | 211.7 $\pm$ 19.2      | 198.0 $\pm$ 11.4                           | 225.8 $\pm$ 19.5                          | 202.8 $\pm$ 18.6                          | 172.1 $\pm$ 13.5                        |
| Diastolic BP (mmHg)       | 113.2 $\pm$ 21.5 | 113.3 $\pm$ 12.6 | 96.1 $\pm$ 8.4        | 144.4 $\pm$ 14.6      | 136.7 $\pm$ 10.3                           | 162.9 $\pm$ 18.6                          | 136.5 $\pm$ 15.0                          | 122.2 $\pm$ 10.8                        |

Rats were prepared for MCAo. Blood from the tail arterial line was analyzed for the indicated variables 5 minutes before MCAo. Values in yellow are significantly different from the corresponding values in Table 5. Values are the mean  $\pm$  SEM.

**Table S2. Physiological Variables: Pre-Reflow**

| Pre-Reflow                | Saline (n=6)     | Vehicle (n=6)    | rt-PA (10 mg/kg; n=5) | rt-PA (30 mg/kg; n=6) | $\Delta$ (K2-K5) Plasmin (0.15 mg/kg; n=6) | $\Delta$ (K2-K5) Plasmin (0.5 mg/kg; n=6) | $\Delta$ (K2-K5) Plasmin (1.5 mg/kg; n=6) | $\Delta$ (K2-K5) Plasmin (5 mg/kg; n=5) |
|---------------------------|------------------|------------------|-----------------------|-----------------------|--------------------------------------------|-------------------------------------------|-------------------------------------------|-----------------------------------------|
| pH                        | 7.44 $\pm$ 0.01  | 7.42 $\pm$ 0.01  | 7.41 $\pm$ 0.02       | 7.43 $\pm$ 0.03       | 7.42 $\pm$ 0.01                            | 7.43 $\pm$ 0.02                           | 7.40 $\pm$ 0.03                           | 7.40 $\pm$ 0.02                         |
| pCO2 (mmHg)               | 38.4 $\pm$ 0.5   | 40.3 $\pm$ 2.2   | 38.5 $\pm$ 0.6        | 37.3 $\pm$ 0.9        | 38.7 $\pm$ 0.6                             | 38.0 $\pm$ 1.3                            | 37.6 $\pm$ 1.6                            | 38.3 $\pm$ 2.4                          |
| pO2 (mmHg)                | 134.8 $\pm$ 6.5  | 119.3 $\pm$ 9.7  | 144.0 $\pm$ 8.2       | 144.3 $\pm$ 6.7       | 134.8 $\pm$ 5.2                            | 136.0 $\pm$ 13.4                          | 144.7 $\pm$ 10.7                          | 132.2 $\pm$ 4.5                         |
| Glu (mmol/L)              | 14.7 $\pm$ 2.4   | 14.2 $\pm$ 2.2   | 23.3 $\pm$ 3.7        | 19.0 $\pm$ 3.0        | 20.0 $\pm$ 3.3                             | 19.9 $\pm$ 3.6                            | 26.8 $\pm$ 4.3                            | 25.7 $\pm$ 4.6                          |
| MABP (mmHg)               | 154.2 $\pm$ 17.7 | 132.7 $\pm$ 14.7 | 108.4 $\pm$ 3.4       | 141.2 $\pm$ 13.1      | 137.9 $\pm$ 13.1                           | 148.3 $\pm$ 12.6                          | 114.4 $\pm$ 9.6                           | 159.8 $\pm$ 12.6                        |
| PP (mmHg)                 | 59.6 $\pm$ 6.7   | 66.0 $\pm$ 6.9   | 67.1 $\pm$ 1.9        | 67.1 $\pm$ 5.4        | 70.1 $\pm$ 2.4                             | 74.7 $\pm$ 9.2                            | 66.0 $\pm$ 5.7                            | 81.4 $\pm$ 7.6                          |
| HR (beats/min)            | 362 $\pm$ 9      | 375 $\pm$ 12     | 343 $\pm$ 5           | 367 $\pm$ 5           | 354 $\pm$ 6                                | 350 $\pm$ 6                               | 339 $\pm$ 7                               | 357 $\pm$ 14                            |
| Body Temp ( $^{\circ}$ C) | 37.0 $\pm$ 0.0   | 37.1 $\pm$ 0.1   | 37.1 $\pm$ 0.1        | 37.0 $\pm$ 0.0        | 37.2 $\pm$ 0.1                             | 37.1 $\pm$ 0.0                            | 37.1 $\pm$ 0.0                            | 37.1 $\pm$ 0.1                          |
| BE (mmol/L)               | 1.5 $\pm$ 0.5    | 2.3 $\pm$ 0.8    | 0.4 $\pm$ 1.6         | 1.0 $\pm$ 2.1         | 0.3 $\pm$ 0.6                              | 0.7 $\pm$ 1.2                             | -1.3 $\pm$ 1.3                            | -0.4 $\pm$ 1.2                          |
| HCO3 (mmol/L)             | 25.3 $\pm$ 0.6   | 27.8 $\pm$ 1.9   | 24.9 $\pm$ 1.3        | 25.2 $\pm$ 1.7        | 24.9 $\pm$ 0.3                             | 25.1 $\pm$ 1.0                            | 23.5 $\pm$ 0.7                            | 24.5 $\pm$ 0.9                          |
| TCO2 (mmol/L)             | 26.3 $\pm$ 0.6   | 27.3 $\pm$ 0.7   | 25.8 $\pm$ 1.3        | 26.2 $\pm$ 1.7        | 25.7 $\pm$ 0.6                             | 26.2 $\pm$ 1.1                            | 24.7 $\pm$ 0.8                            | 25.8 $\pm$ 1.1                          |
| sO2 (%)                   | 99.2 $\pm$ 0.2   | 98.5 $\pm$ 0.2   | 99.2 $\pm$ 0.2        | 99.3 $\pm$ 0.2        | 99.0 $\pm$ 0.0                             | 99.0 $\pm$ 0.3                            | 99.2 $\pm$ 0.2                            | 99.0 $\pm$ 0.0                          |
| Na (mmol/L)               | 140.3 $\pm$ 0.6  | 140.5 $\pm$ 0.9  | 139.4 $\pm$ 1.0       | 137.8 $\pm$ 0.7       | 139.0 $\pm$ 0.7                            | 139.7 $\pm$ 0.7                           | 138.3 $\pm$ 0.7                           | 138.6 $\pm$ 1.3                         |
| K (mmol/L)                | 4.1 $\pm$ 0.1    | 4.2 $\pm$ 0.0    | 4.1 $\pm$ 0.1         | 4.1 $\pm$ 0.1         | 3.9 $\pm$ 0.0                              | 3.9 $\pm$ 0.1                             | 3.8 $\pm$ 0.2                             | 4.3 $\pm$ 0.0                           |
| iCa (mmol/L)              | 1.2 $\pm$ 0.0    | 1.2 $\pm$ 0.0    | 1.2 $\pm$ 0.0         | 1.1 $\pm$ 0.0         | 1.2 $\pm$ 0.0                              | 1.2 $\pm$ 0.0                             | 1.2 $\pm$ 0.0                             | 1.2 $\pm$ 0.0                           |
| Hct (PCV)                 | 0.45 $\pm$ 0.01  | 0.45 $\pm$ 0.01  | 0.46 $\pm$ 0.01       | 0.41 $\pm$ 0.02       | 0.47 $\pm$ 0.01                            | 0.47 $\pm$ 0.01                           | 0.48 $\pm$ 0.01                           | 0.48 $\pm$ 0.01                         |
| Hb (mmol/L)               | 15.2 $\pm$ 0.3   | 15.4 $\pm$ 0.4   | 15.7 $\pm$ 0.2        | 14.1 $\pm$ 0.8        | 15.9 $\pm$ 0.4                             | 15.9 $\pm$ 0.4                            | 16.2 $\pm$ 0.3                            | 16.3 $\pm$ 0.2                          |
| Systolic BP (mmHg)        | 185.2 $\pm$ 17.5 | 170.1 $\pm$ 15.3 | 149.7 $\pm$ 3.6       | 182.0 $\pm$ 12.1      | 180.1 $\pm$ 12.9                           | 193.0 $\pm$ 15.9                          | 153.3 $\pm$ 12.9                          | 208.6 $\pm$ 15.3                        |
| Diastolic BP (mmHg)       | 125.6 $\pm$ 15.9 | 104.1 $\pm$ 12.0 | 82.5 $\pm$ 2.7        | 114.9 $\pm$ 12.7      | 110.1 $\pm$ 11.6                           | 118.4 $\pm$ 10.5                          | 87.3 $\pm$ 7.7                            | 127.2 $\pm$ 10.6                        |

Rats were prepared for snare ligation removal. Blood from the tail arterial line was analyzed for the indicated variables 5 minutes before reflow. The significant rise in plasma glucose reflects allowing the rats free access to food between the MCAo and reflow surgeries. Values are the mean  $\pm$  SEM.

**Table S3. Physiological Variables: End of Test Article Infusion**

| End of Test Article Infusion | Saline (n=6)     | Vehicle (n=6)   | rt-PA (10 mg/kg; n=5) | rt-PA (30 mg/kg; n=6) | $\Delta$ (K2-K5) Plasmin (0.15 mg/kg; n=6) | $\Delta$ (K2-K5) Plasmin (0.5 mg/kg; n=6) | $\Delta$ (K2-K5) Plasmin (1.5 mg/kg; n=6) | $\Delta$ (K2-K5) Plasmin (5 mg/kg; n=5) |
|------------------------------|------------------|-----------------|-----------------------|-----------------------|--------------------------------------------|-------------------------------------------|-------------------------------------------|-----------------------------------------|
| Systolic BP (mmHg)           | 173.4 $\pm$ 15.8 | 160.8 $\pm$ 4.7 | 211.0 $\pm$ 9.7       | 191.8 $\pm$ 8.4       | 179.3 $\pm$ 14.6                           | 169.8 $\pm$ 16.3                          | 167.2 $\pm$ 11.9                          | 204.3 $\pm$ 15.0                        |
| Diastolic BP (mmHg)          | 114.4 $\pm$ 12.0 | 99.2 $\pm$ 6.3  | 124.0 $\pm$ 10.6      | 103.6 $\pm$ 8.9       | 111.4 $\pm$ 12.3                           | 118.4 $\pm$ 10.5                          | 104.0 $\pm$ 8.2                           | 125.4 $\pm$ 13.0                        |
| MABP (mmHg)                  | 138.2 $\pm$ 13.8 | 121.1 $\pm$ 5.4 | 158.5 $\pm$ 11.7      | 137.4 $\pm$ 9.4       | 137.9 $\pm$ 13.2                           | 124.0 $\pm$ 12.5                          | 130.2 $\pm$ 9.4                           | 157.4 $\pm$ 14.7                        |
| HR (beats/min)               | 361 $\pm$ 10     | 358 $\pm$ 8     | 356 $\pm$ 7           | 340 $\pm$ 6           | 352 $\pm$ 9                                | 346 $\pm$ 9                               | 338 $\pm$ 7                               | 356 $\pm$ 8                             |
| PP (mmHg)                    | 59.0 $\pm$ 6.1   | 61.6 $\pm$ 5.9  | 86.9 $\pm$ 5.4*       | 88.3 $\pm$ 4.7*       | 68.0 $\pm$ 4.5                             | 72.3 $\pm$ 7.8                            | 63.2 $\pm$ 5.5                            | 78.8 $\pm$ 6.5                          |

\* p<0.05 compared to Pre-Reflow values (t-test). PP is pulse pressure

**Table S4, S5 and S6. Data presented in Figures 9, 12 and 13, respectively**

**S4. Bleeding Score (Figure 9)**

| Group                       | Median | 5%  | 95% |
|-----------------------------|--------|-----|-----|
| Saline                      | 1.5    | 1   | 2.5 |
| Vehicle                     | 1.5    | 0   | 2.4 |
| 10 mg/kg rt-PA              | 3      | 1.5 | 4.5 |
| 30 mg/kg rt-PA              | 4.75   | 2   | 5   |
| 0.15 mg/kg Δ(K2-K5) plasmin | 2.25   | 1   | 3   |
| 0.5 mg/kg Δ(K2-K5) plasmin  | 2.25   | 2   | 4   |
| 1.5 mg/kg Δ(K2-K5) plasmin  | 1.75   | 1   | 2.5 |
| 5 mg/kg Δ(K2-K5) plasmin    | 2      | 1   | 3   |

**S5. Modified Bederson Score (Figure 12)**

|                             |      |      |      |
|-----------------------------|------|------|------|
| Saline                      | 2    | 2    | 3    |
| Vehicle                     | 2    | 1.33 | 2.33 |
| 10 mg/kg rt-PA              | 2.33 | 2    | 3.33 |
| 30 mg/kg rt-PA              | 3.33 | 2.33 | 4    |
| 0.15 mg/kg Δ(K2-K5) plasmin | 2.16 | 1    | 2.33 |
| 0.5 mg/kg Δ(K2-K5) plasmin  | 1.67 | 1.33 | 2    |
| 1.5 mg/kg Δ(K2-K5) plasmin  | 2    | 1.33 | 2.33 |
| 5 mg/kg Δ(K2-K5) plasmin    | 2.33 | 2    | 2.33 |

**S6. General Behavioral Score (Figure 13)**

|                             |      |      |      |
|-----------------------------|------|------|------|
| Saline                      | 1    | 1    | 2    |
| Vehicle                     | 1.25 | 1    | 2    |
| 10 mg/kg rt-PA              | 1    | 1    | 3    |
| 30 mg/kg rt-PA              | 3    | 2.5  | 5    |
| 0.15 mg/kg Δ(K2-K5) plasmin | 0.75 | 0.5  | 1    |
| 0.5 mg/kg Δ(K2-K5) plasmin  | 1    | 0.75 | 1    |
| 1.5 mg/kg Δ(K2-K5) plasmin  | 1    | 0.75 | 2    |
| 5 mg/kg Δ(K2-K5) plasmin    | 0.75 | 0.5  | 1.25 |
